# Supplementary material for: Improving CHA2DS2-VASc stratification of non-fatal stroke and mortality risk using the Intermountain Mortality Risk Score among patients with atrial fibrillation
Source: PubMed Central journal article supplement — Open Heart. 2018 Nov 17;5(2):e000907. doi: 10.1136/openhrt-2018-000907 (PMC6269639; doi:10.1136/openhrt-2018-000907), 2018-11-17

Supplemental Materials for the study:

## **Improving CHA<sub>2</sub>DS<sub>2</sub>-VASc Stratification of Non-Fatal Stroke and Mortality Risk**

### **Using the Intermountain Risk Score among Atrial Fibrillation Patients**

Kevin G. Graves<sup>1</sup>, Heidi T. May<sup>1</sup>, Kirk U. Knowlton<sup>1</sup>, Joseph B. Muhlestein<sup>1,2</sup>, Victoria Jacobs<sup>1</sup>, Donald L.

Lappé<sup>1,2</sup>, Jeffrey L. Anderson<sup>1,2</sup>, Benjamin D. Horne<sup>1,3¶</sup>, T. Jared Bunch<sup>1,4¶</sup>

<sup>1</sup>Intermountain Heart Institute, Intermountain Medical Center; <sup>2</sup>Cardiology Division, Department of Internal Medicine, University of Utah; <sup>3</sup>Department of Biomedical Informatics, University of Utah. Salt Lake City, UT.

<sup>4</sup>Stanford University, Department of Internal Medicine, Palo Alto, California

¶Contributed equally to this study.

**Supplemental Table S1.** Prediction of stroke/mortality by IMRS and CHA<sub>2</sub>DS<sub>2</sub>-VASC in females and males.

| Outcome or Metric         | Females                                |                       | Males                                  |                       |
|---------------------------|----------------------------------------|-----------------------|----------------------------------------|-----------------------|
|                           | CHA <sub>2</sub> DS <sub>2</sub> -VASC | IMRS                  | CHA <sub>2</sub> DS <sub>2</sub> -VASC | IMRS                  |
|                           | <b>≥2 vs. &lt;2</b>                    | <b>≥9 vs. &lt;9</b>   | <b>≥2 vs. &lt;2</b>                    | <b>≥11 vs. &lt;11</b> |
| n=                        | 3,765 vs. 357                          | 3,126 vs. 996         | 4,208 vs. 1,747                        | 3,582 vs. 2,373       |
| Stroke or Mortality       | 44% vs. 4%                             | 48% vs. 6%            | 44% vs. 9%                             | 47% vs. 9%            |
| Positive Predictive Value | 43.7%                                  | 48.4%                 | 44.3%                                  | 47.3%                 |
| Negative Predictive Value | 80.8%                                  | 66.5%                 | 77.5%                                  | 68.6%                 |
| Specificity               | 12.8%                                  | 33.7%                 | 38.5%                                  | 50.5%                 |
| Sensitivity               | 97.3%                                  | 89.5%                 | 87.0%                                  | 79.0%                 |
| Accuracy                  | 47.5%                                  | 56.6%                 | 56.0%                                  | 60.7%                 |
|                           | <b>≥3 vs. &lt;3</b>                    | <b>≥15 vs. &lt;15</b> | <b>≥3 vs. &lt;3</b>                    | <b>≥17 vs. &lt;17</b> |
| n=                        | 3,117 vs. 1,005                        | 997 vs. 3,125         | 2,745 vs. 3,210                        | 791 vs. 5,164         |
| Stroke or Mortality       | 48% vs. 19%                            | 64% vs. 34%           | 52% vs. 22%                            | 66% vs. 31%           |
| Positive Predictive Value | 48.1%                                  | 64.5%                 | 51.8%                                  | 65.9%                 |
| Negative Predictive Value | 87.4%                                  | 82.2%                 | 84.1%                                  | 81.0%                 |
| Specificity               | 33.4%                                  | 85.4%                 | 65.3%                                  | 92.9%                 |
| Sensitivity               | 88.6%                                  | 38.0%                 | 66.3%                                  | 24.3%                 |
| Accuracy                  | 56.0%                                  | 66.0%                 | 65.7%                                  | 68.2%                 |

**Supplemental Figure S1.** Kaplan-Meier survival curves showing the ability of IMRS to stratify stroke/mortality among females discharged without a prescription for an anticoagulant whose CHA<sub>2</sub>DS<sub>2</sub>-VASc score was: A1) 1 (p-trend<0.001, IMRS <9: n=143, 9-14: n=47, ≥15: n=3), B1) 2 (p-trend<0.001, IMRS <9: n=140, 9-14: n=128, ≥15: n=20), and C1) >2 (p-trend<0.001, IMRS <9: n=208, 9-14: n=890, ≥15: n=433), and among those with an anticoagulant prescribed whose CHA<sub>2</sub>DS<sub>2</sub>-VASc score was: A2) 1 (p-trend=0.19, IMRS <9: n=108, 9-14: n=50, ≥15: n=6), B2) 2 (p-trend<0.001, IMRS <9: n=172, 9-14: n=168, ≥15: n=20), and C2) >2 (p-trend<0.001, IMRS <9: n=225, 9-14: n=846, ≥15: n=515). Compare Figure 2. Note that the distribution of patients between those receiving and not receiving a prescription for an anticoagulant are similar in each CHA<sub>2</sub>DS<sub>2</sub>-VASc category.

**No Anticoagulant**

**Anticoagulant Prescribed**

A1)

A2)

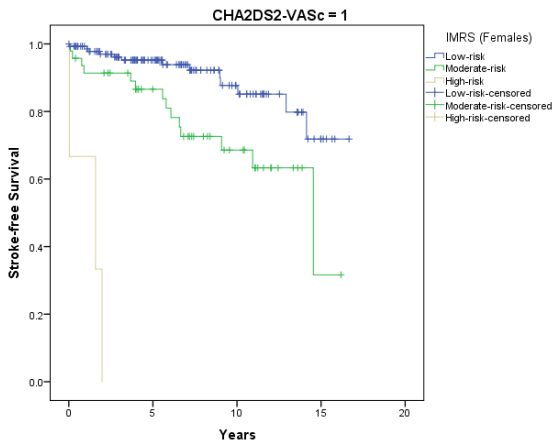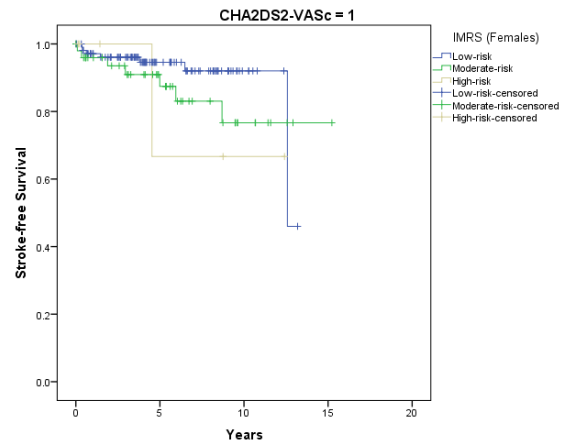

**No Anticoagulant**

B1)

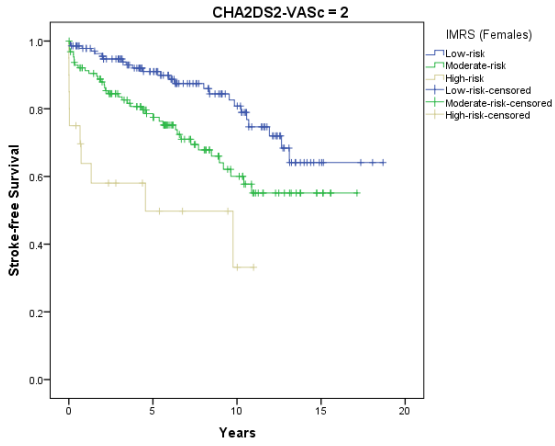

**Anticoagulant Prescribed**

B2)

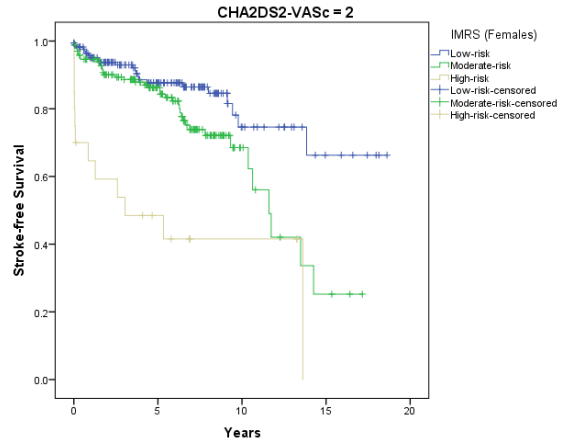

C1)

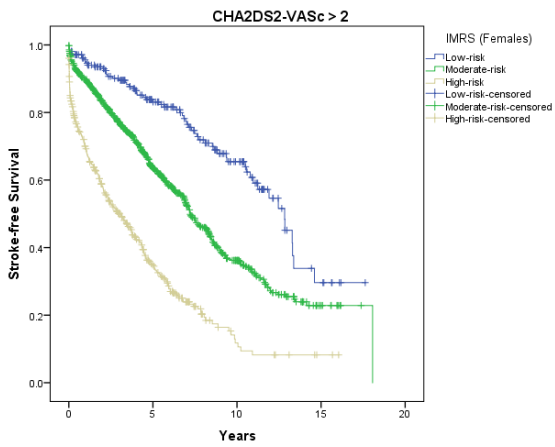

C2)

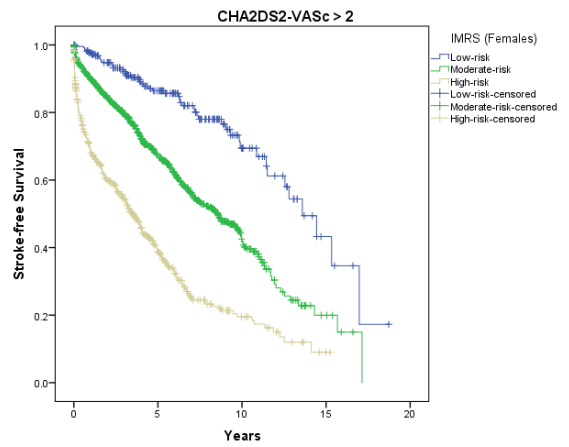

**Supplemental Figure S2.** Kaplan-Meier survival curves showing the ability of IMRS to stratify stroke/mortality among males discharged without a prescription for an anticoagulant whose CHA<sub>2</sub>DS<sub>2</sub>-VASc score was: A1) <2 (p-trend<0.001, IMRS <11: n=512, 11-16: n=203, ≥17: n=28), B1) 2 (p-trend<0.001, IMRS <11: n=272, 11-16: n=380, ≥17: n=63), and C1) >2 (p-trend<0.001, IMRS <11: n=319, 11-16: n=800, ≥17: n=342), and among those with an anticoagulant prescribed whose CHA<sub>2</sub>DS<sub>2</sub>-VASc score was: A2) <2 (p-trend<0.001, IMRS <11: n=682, 11-16: n=297, ≥17: n=25), B2) 2 (p-trend<0.001, IMRS <11: n=322, 11-16: n=361, ≥17: n=65), and C2) >2 (p-trend<0.001, IMRS <11: n=266, 11-16: n=750, ≥17: n=268). Compare Figure 3. Note that the distribution of patients between those receiving and not receiving a prescription for an anticoagulant are similar in each CHA<sub>2</sub>DS<sub>2</sub>-VASc category.

**No Anticoagulant**

**Anticoagulant Prescribed**

A1)

A2)

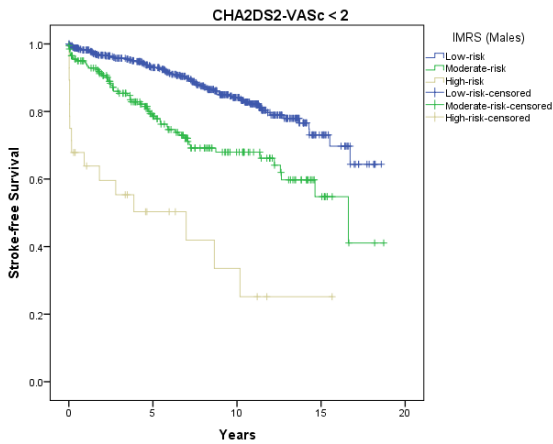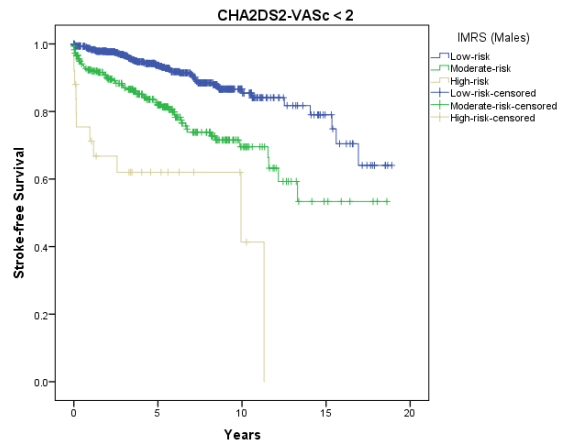

**No Anticoagulant**

B1)

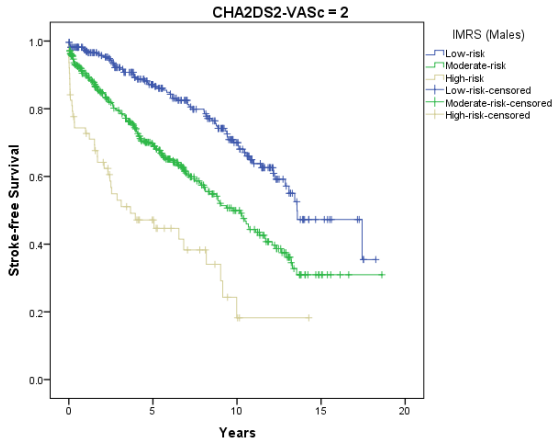

**Anticoagulant Prescribed**

B2)

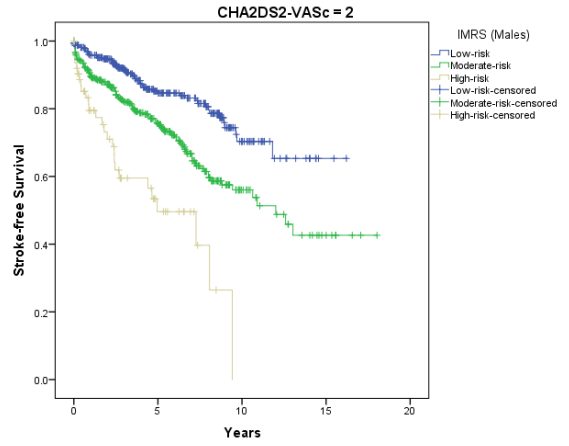

C1)

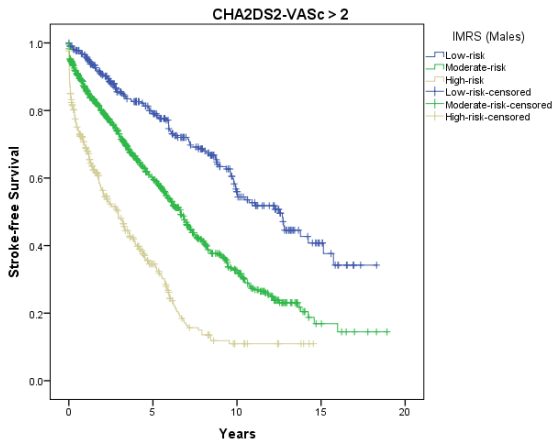

C2)

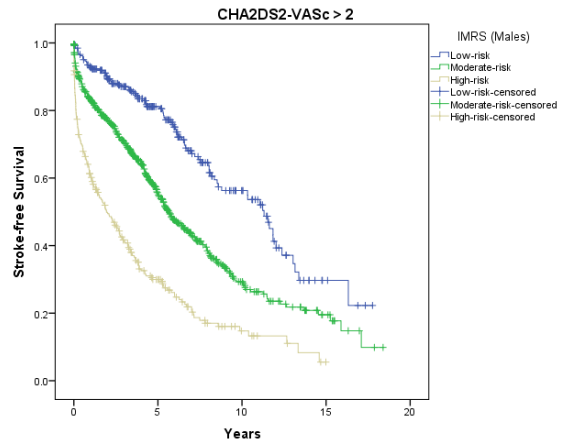

Supplement: openhrt-2018-000907supp001.pdf [file openhrt-2018-000907supp001.pdf]
